# Supplementary material for: Exploring Optimal Biomarker Sources: A Comparative Analysis of Exosomes and Whole Plasma in Fasting and Non-Fasting Conditions for Liquid Biopsy Applications
Source: Int J Mol Sci. 2023 Dec 27;25(1):371. doi: 10.3390/ijms25010371 (PMC10779159; doi:10.3390/ijms25010371)

## Supplementary Information

### Exploring Optimal Biomarker Sources: A Comparative Analysis of Exosomes and Whole Plasma in Fasting and Non-Fasting Conditions for Liquid Biopsy Applications

**Supplementary Table S1.** Number of metabolite species detected by LC-MS/MS. We detected total of 513 metabolites from whole plasma samples and 261 from exosomes.

| Type of metabolites | Plasma | Exosomes |
|---------------------|--------|----------|
| Amino acids         | 30     | 13       |
| Bile acids          | 35     | 3        |
| Fatty acids         | 39     | 25       |
| TG DG               | 80     | 61       |
| Lipids              | 329    | 159      |

**Supplementary Table S2.** Metabolites species significantly affected by fasting/non-fasting status found by the volcano plot analysis.

|                            | FC      | log2(FC) | P value    | Log10(p) | Type of metabolites |
|----------------------------|---------|----------|------------|----------|---------------------|
| Beta_Alanine               | 2.0786  | 1.0556   | 0.0027003  | 2.5686   | Amino acid          |
| NorCA                      | 3.079   | 1.6225   | 0.00096121 | 3.0172   | Bile acid           |
| alloLCA                    | 0.53841 | -0.89323 | 0.0044331  | 2.3533   | Bile acid           |
| GCDCA                      | 3.018   | 1.5936   | 0.017655   | 1.7531   | Bile acid           |
| DCA                        | 0.60349 | -0.7286  | 0.024179   | 1.6166   | Bile acid           |
| GDCA                       | 2.6626  | 1.4128   | 0.045147   | 1.3454   | Bile acid           |
| C8:0                       | 1.8261  | 0.86876  | 0.0046764  | 2.3301   | Fatty acid          |
| C6:0                       | 1.6173  | 0.69357  | 0.013595   | 1.8666   | Fatty acid          |
| C20:4(cis_5,8,11,14)       | 0.63922 | -0.64561 | 0.029967   | 1.5234   | Fatty acid          |
| C22:4(cis_7,10,13,16)      | 0.60597 | -0.72268 | 0.033014   | 1.4813   | Fatty acid          |
| C20:5(cis_5,8,11,14,17)    | 0.66825 | -0.58154 | 0.033866   | 1.4702   | Fatty acid          |
| C22:6(cis_4,7,10,13,16,19) | 0.51495 | -0.95749 | 0.046803   | 1.3297   | Fatty acid          |
| C10:1                      | 0.61041 | -0.71214 | 0.0024672  | 2.6078   | Lipids              |
| LPE(18:3)                  | 1.8587  | 0.89431  | 0.0032373  | 2.4898   | Lipids              |
| C24:5 CE                   | 0.65995 | -0.59958 | 0.0037706  | 2.4236   | Lipids              |
| PE(36:3)                   | 2.22    | 1.1506   | 0.0059099  | 2.2284   | Lipids              |
| C8                         | 0.51865 | -0.94716 | 0.0059176  | 2.2279   | Lipids              |
| PE(34:0)                   | 2.3969  | 1.2612   | 0.0065935  | 2.1809   | Lipids              |
| PE(36:1)                   | 2.1074  | 1.0754   | 0.0067634  | 2.1698   | Lipids              |
| C14:2                      | 0.57306 | -0.80323 | 0.0074514  | 2.1278   | Lipids              |
| C10                        | 0.48996 | -1.0293  | 0.0078469  | 2.1053   | Lipids              |
| PE(34:1)                   | 1.5045  | 0.58925  | 0.0084805  | 2.0716   | Lipids              |
| PE(36:5)                   | 1.4196  | 0.50551  | 0.0085363  | 2.0687   | Lipids              |
| C12:1                      | 0.62324 | -0.68215 | 0.0093646  | 2.0285   | Lipids              |
| PE(34:2)                   | 1.6736  | 0.74291  | 0.0096563  | 2.0152   | Lipids              |
| LPE(18:1)                  | 1.5282  | 0.61179  | 0.0097845  | 2.0095   | Lipids              |
| C12                        | 0.55351 | -0.85332 | 0.010203   | 1.9913   | Lipids              |
| LPE(22:5)                  | 1.4508  | 0.53685  | 0.010689   | 1.9711   | Lipids              |
| LPE(18:2)                  | 1.649   | 0.72156  | 0.011611   | 1.9351   | Lipids              |
| C16:2                      | 0.60373 | -0.72803 | 0.012639   | 1.8983   | Lipids              |
| PE(36:2)                   | 1.9388  | 0.95518  | 0.013554   | 1.8679   | Lipids              |
| PE(34:3)                   | 1.7351  | 0.79504  | 0.013775   | 1.8609   | Lipids              |
| C14:1                      | 0.57287 | -0.80371 | 0.014334   | 1.8436   | Lipids              |
| PE(40:8)                   | 1.8536  | 0.89034  | 0.019088   | 1.7192   | Lipids              |
| PE(32:2)                   | 1.4159  | 0.50174  | 0.022035   | 1.6569   | Lipids              |
| PS(44:2)                   | 1.5785  | 0.65852  | 0.024037   | 1.6191   | Lipids              |
| C18:1-OH                   | 0.60669 | -0.72097 | 0.027108   | 1.5669   | Lipids              |
| C14:1-OH                   | 0.66287 | -0.59319 | 0.028463   | 1.5457   | Lipids              |
| PE(42:8)                   | 1.6385  | 0.71234  | 0.028693   | 1.5422   | Lipids              |
| PE(32:0)                   | 1.7153  | 0.77843  | 0.037441   | 1.4267   | Lipids              |
| Cer(d18:0/16:0)            | 1.665   | 0.73552  | 0.040398   | 1.3936   | Lipids              |
| Cer(d18:0/24:0)            | 1.433   | 0.519    | 0.041156   | 1.3856   | Lipids              |
| PS(44:3)                   | 1.7628  | 0.81788  | 0.041412   | 1.3829   | Lipids              |
| C7-DC                      | 0.65193 | -0.61721 | 0.043846   | 1.3581   | Lipids              |
| C16:1-OH                   | 0.70403 | -0.50629 | 0.04466    | 1.3501   | Lipids              |

**Supplementary Table S3.** Percentage of unstable metabolites species affected by fasting/ non-fasting status detected in whole plasma. Fold-change within 1.4 is stable samples.

| <b>Type of metabolites</b> | <b>Number of Species</b> | <b>Stable Species</b> | <b>Unstable Species</b> | <b>% of Unstable</b> |
|----------------------------|--------------------------|-----------------------|-------------------------|----------------------|
| <b>TG/DG</b>               | 80                       | 9                     | 71                      | <b>88.75</b>         |
| <b>Amino Acids</b>         | 30                       | 28                    | 2                       | <b>6.67</b>          |
| <b>Bile Acids</b>          | 35                       | 18                    | 17                      | <b>48.57</b>         |
| <b>Fatty Acids</b>         | 39                       | 20                    | 19                      | <b>48.72</b>         |
| <b>Lipids</b>              | 329                      | 292                   | 37                      | <b>11.25</b>         |

**Supplementary Table S4.** Information of 4 Volunteers for blood collection.

| <b>Volunteer</b> | <b>Sex</b> | <b>Age</b> | <b>Race</b> |
|------------------|------------|------------|-------------|
| A                | Male       | 52         | Asian       |
| B                | Male       | 38         | Caucasian   |
| C                | Female     | 52         | Asian       |
| D                | Male       | 30         | Asian       |

**Supplementary Figure S1.** Volcano plots display the metabolite species of exosomes with significant changes after food consumption. Red dots: upregulation, Blue dots: downregulation, Gray: Non-significant changes. A) TG (Triacylglycerol)-DG (Diacylglycerol), B) Lipids.

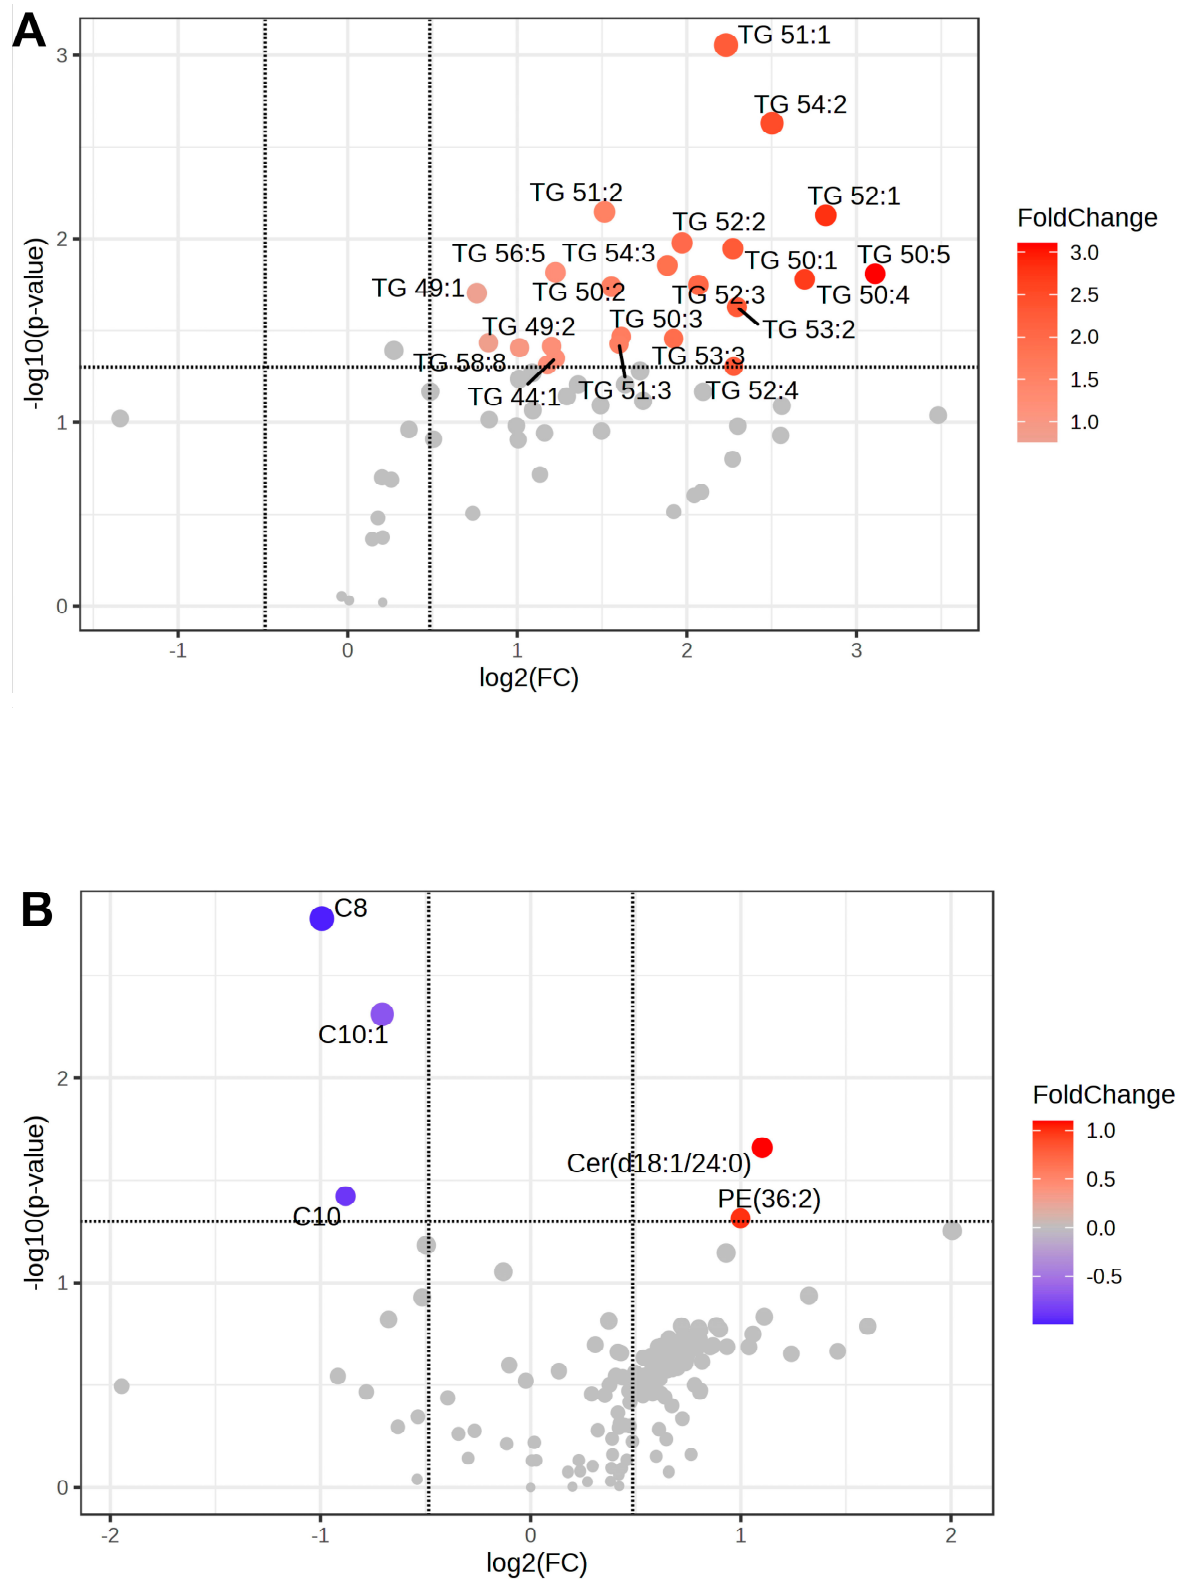

**Supplementary Figure S2.** Images of exosomes (EVs) extracted with the Capturem™ Extracellular Vesicle Isolation Kit (Cat. No. 635741, Takara Bio USA, Inc.) from our samples that were taken with a TEM (Transmission Electron Microscope) utilizing negative staining. 4μL of the sample was applied to the surface of a carbon and Formvar-coated grid for 45 seconds. Excess fluid was wicked away with a filter paper point. 10μL of distilled water was then applied, with the excess water being removed. 4μL (e.g., 2% uranyl acetate) was applied for 45 seconds. Excess fluid was wicked away again. 10μL of distilled water was applied for a second time. As the objective was to leave the same height of stain as the height of particles in the sample, excess fluid was carefully absorbed using a filter paper point. The goal was to keep only a very thin film of fluid on the grid, which would then be left to air dry.

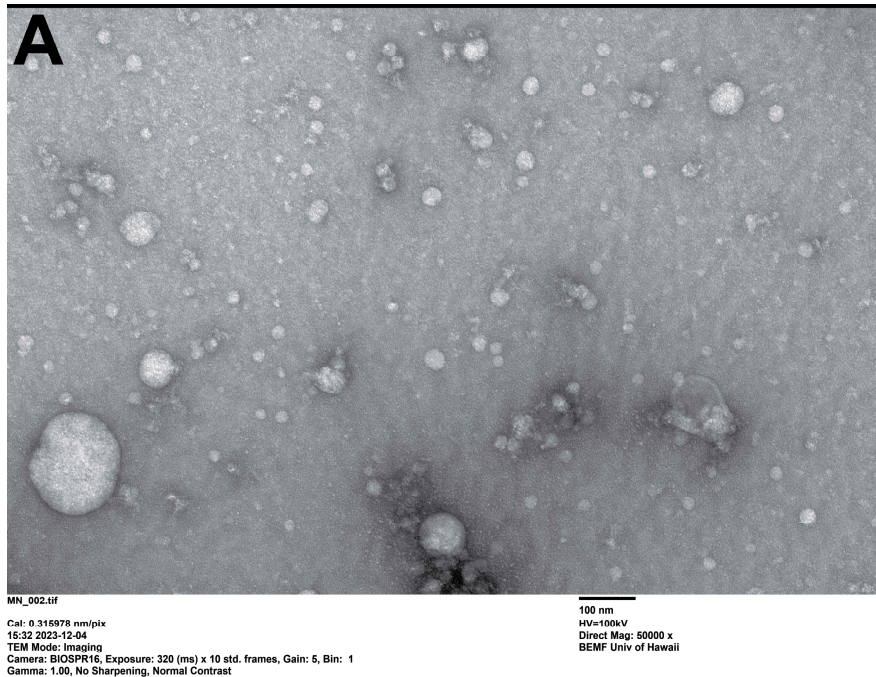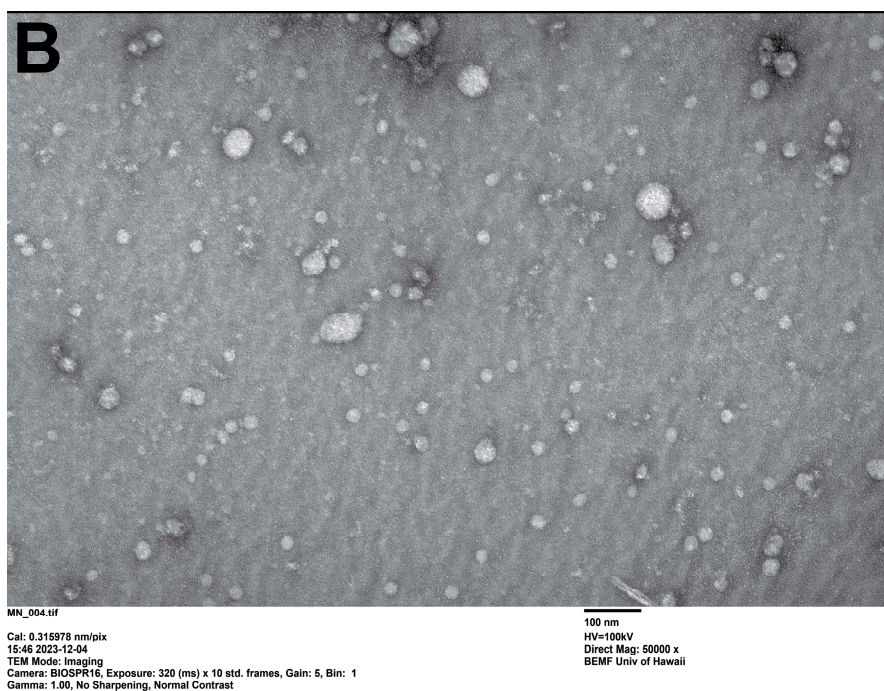

Supplement: Supplementary file 1 [file ijms-25-00371-s001.zip › ijms-2778616-supplementary.pdf]
